# Supplementary material
Source: Research Square preprint supplement (doi:10.21203/rs.3.rs-9072879/v1)
Supplement: Supplementary file 1 [file 3edf1e081984009974995c66.docx]

**Table 1.** Range of independent variables chosen for CCD

| Factors | Name | Units | Type | Sub Type | Min. | Max. | Coded Low | Coded High | Mean | Std. Dev. |
| --- | --- | --- | --- | --- | --- | --- | --- | --- | --- | --- |
| A | Temperature | C | Numeric | Continuous | 26.59 | 43.41 | -1 **↔**  30.00 | +1**↔**  40.00 | 35.0 | 4.24 |
| B | Conc. | mg/L | Numeric | Continuous | 31.82 | 368.18 | -1 **↔**  100.00 | +1**↔**  300.00 | 200.0 | 84.78 |
| C | pH | % | Numeric | Continuous | 2.30 | 10.70 | -1 **↔**  4.00 | +1**↔**  9.00 | 6.5 | 2.12 |

**Table 2.** Plan of experiment including range and parameters chosen for RSM and wet lab work as per conditions

|  |  | A: | B: | C: | Predicted | Experimental |
| --- | --- | --- | --- | --- | --- | --- |
| Std. | Run | Temperature | Concentration | pH | Degradation | Degradation |
|  |  | oC | mg/L |  | (%) | (%) |
| 1 | 1 | 30 | 100 | 4 | 78.74 | 80.1 |
| 16 | 2 | 35 | 200 | 6.5 | 89.98 | 89.0 |
| 15 | 3 | 35 | 200 | 6.5 | 89.98 | 89.2 |
| 4 | 4 | 40 | 300 | 4 | 44.29 | 44.5 |
| 20 | 5 | 35 | 200 | 6.5 | 89.98 | 89.2 |
| 19 | 6 | 35 | 200 | 6.5 | 89.98 | 92.3 |
| 17 | 7 | 35 | 200 | 6.5 | 89.98 | 90.5 |
| 18 | 8 | 35 | 200 | 6.5 | 89.98 | 91.1 |
| 13 | 9 | 35 | 200 | 2.29552 | 32.74 | 31.4 |
| 11 | 10 | 35 | 31.8207 | 6.5 | 94.17 | 93.3 |
| 3 | 11 | 30 | 300 | 4 | 53.65 | 55.2 |
| 9 | 12 | 26.591 | 200 | 6.5 | 89.51 | 88.6 |
| 12 | 13 | 35 | 368.179 | 6.5 | 51.47 | 51.8 |
| 8 | 14 | 40 | 300 | 9 | 42.87 | 42.2 |
| 7 | 15 | 30 | 300 | 9 | 49.98 | 49.5 |
| 10 | 16 | 43.409 | 200 | 6.5 | 80.33 | 81.2 |
| 6 | 17 | 40 | 100 | 9 | 68.56 | 67.8 |
| 14 | 18 | 35 | 200 | 10.7045 | 24.3 | 25.2 |
| 5 | 19 | 30 | 100 | 9 | 70.12 | 71.5 |
| 2 | 20 | 40 | 100 | 4 | 74.93 | 76.2 |

**Table 3.** The blast results revealed that NR_148273.1 (*Bacillus haikouensis)* matches best with our first sequence and NR_042415.1. the similarity score, percent identity, e value and are detailed in the table below.

| **Query** | **Best Matching Sequence** | **Score** | **E value** | **Query Coverage** | **Percent Identity** |
| --- | --- | --- | --- | --- | --- |
| Sequence 11523 | *Bacillus haikouensis* C-89 16S ribosomal RNA, Partial sequence NR_148273.1 | 2480 | 0.0 | 96% | 97.68% |

**Table 4.** Analysis of Variance (ANNOVA) for best fit quadratic polynomial model for Toulene removal

| **Source** | **Sum of Squares** | **df** | **Mean Square** | **F-value** | **p-value** |
| --- | --- | --- | --- | --- | --- |
| **Model** | 9453.48 | 9 | 1050.39 | 462.31 | < 0.0001* |
| **A-Temperature** | 101.72 | 1 | 101.72 | 44.77 | < 0.0001 |
| **B-Conc.** | 2201.39 | 1 | 2201.39 | 968.90 | < 0.0001 |
| **C-pH** | 85.92 | 1 | 85.92 | 37.82 | 0.0001 |
| **AB** | 15.40 | 1 | 15.40 | 6.78 | 0.0263 |
| **AC** | 2.53 | 1 | 2.53 | 1.11 | 0.3160 |
| **BC** | 12.25 | 1 | 12.25 | 5.39 | 0.0426 |
| **A²** | 46.10 | 1 | 46.10 | 20.29 | 0.0011 |
| **B²** | 530.37 | 1 | 530.37 | 233.43 | < 0.0001 |
| **C²** | 6804.22 | 1 | 6804.22 | 2994.76 | < 0.0001 |
| **Residual** | 22.72 | 10 | 2.27 |  |  |
| **Lack of Fit** | 14.72 | 5 | 2.94 | 1.84 | 0.2598** |
| **Pure Error** | 8.00 | 5 | 1.60 |  |  |
| **Cor Total** | 9476.20 | 19 |  |  |  |
| *: significant; **: not significant | | | | | |

**Table 5.** Table below enlists the degraded compounds obtained from GC-MS

| **Peak No.** | **Retention time, tR (min)** | **Compound Identified** | **Degraded Peak Area (%)** | **Ion(s) m/z Fragments** | **Mechanism** |
| --- | --- | --- | --- | --- | --- |
| 1 | 6.2 | Light aliphatic hydrocarbon | 6.5 | 43, 57 | Early eluting volatile degradation product |
| 2 | 7.8 | Benzene derivative C₆H₆ (trace) | 4.3 | 78, 77, 51 | Aromatic breakdown product |
| 3 | 9.4 | Ethyl benzene / xylene C₈H₁₀ (trace) | 8.7 | 91, 106, 77 | Alkylated aromatic intermediate |
| 4 | 13.1 | Toluene C₇H₈ (residual) | 32.1 | 91, 92, 65 | Reduced intensity vs standard |
| 5 | 15.2 | Benzaldehyde  C₇H₆O | 20.2 | 105, 77, 51 | Oxidative degradation product |
| 6 | 17.9 | Benzoic acid (derivative) | 14.8 | 105, 77 | Advanced oxidation product |
| 7 | 19.6 | Heavy Aromatic residues | 13.4 | 91, 115 | Late-eluting degradation residue |
